# Supplementary material
Source: publisher figshare collection journal article supplement (https://asha.figshare.com/ndownloader/files/38698491)
Supplement: Supplementary file 1 [file 38698491]

**Supplemental Material S1.** Sample transcripts from survivors of right hemisphere brain damage (RHD).

INV = Investigator; PAR = Participant; STU = Graduate Assistant

**Minga 08 (Black, 57 years old; RHD; 3 questions asked)**

@G: First\_Encounter

INV1: alright , well ‡ now I'm gonna ask you to do a few more things where you'll needta talk .

PAR: okay .

INV1: I would like you to meet someone that you have not met before .

INV1: she's a student here .

INV1: and I would like you to get to know her .

INV1: this is not an interview .

INV1: so she doesn't have a list of questions to ask you .

INV1: she'll just talk with you to try to get to know you too .

PAR: mkay .

INV1: I'm gonna go get her really quickly .

INV1: www .

PAR: so ‡ this is Firstname .

INV1: hi &=laughs .

INV1: she scare ya ?

PAR: yeah ‡ a little bit .

INV1: uhuh .

PAR: the way you said or should xxx [=! mumbling] .

PAR: I think either way is fine .

STU: okay .

INV1: so ‡ we'll just let yall chat .

PAR: hi Firstname .

STU: hi .

STU: it's Miss\_Lastname ,, correct ?

PAR: +< yes .

STU: okay .

STU: so ‡ we're just here to get to know each\_other .

PAR: okay .

PAR: you came in last , I'd forgotten .

PAR: +" wow .

PAR: that's what I was thinking +".

PAR: I was waiting for +//.

STU: +< &=laughs .

PAR: and I thought maybe she was going to the door &=ges:opening\_door .

PAR: &=ges:looking\_outside or I thought maybe Doctor\_Minga was back .

STU: &=laughs no ‡ I don't think they're back yet .

PAR: threw me off .

STU: &=laughs .

STU: so ‡ how long have you lived on Garner ?  
PAR: since two thousand two .  
STU: nice .  
STU: so ‡ you like the area ?  
PAR: I do &=head yes , much better than when I lived in Durham .  
STU: oh ‡ where'd you live out in Durham ?  
PAR: near &um what useta be Durham\_Regional .  
PAR: I think it's a Duke\_Regional now or something .  
STU: +< Regional , yeah .  
STU: yeah ‡ I was actually born in that hospital .  
PAR: +< is that right ?  
STU: mhm .  
STU: yep ‡ many , many years ago &=laughs .  
PAR: wow .  
PAR: I was right off &=ges:line of Carver (.) that ran &=ges kind\_of down in  
front of Golden\_Corral and the credit union .  
STU: +< oh ‡ nice .  
PAR: in the housing development back there .  
STU: so ‡ what do you do in your spare time these days ?  
PAR: mm (.) I like to read .  
PAR: I like listening to music .  
PAR: &um (..) I'm involved in a few different ministries at my church .  
PAR: &um first aid ministry , xxx ministry , homeless project , and missionaries . PAR:  
so ‡ they are different activities &=ges that go along with the various ministries .  
PAR: visiting sick and shut in individuals .  
PAR: &uh feeding (.) , clothing the homeless with that project .  
PAR: and the seeing [?] ministry that's kind\_of a they just kind\_of get together .  
PAR: but just you\_know &=ges:around chance to socialize with other people .  
PAR: and check in on &=ges them and that sort of deal .  
PAR: and then &=ges:side\_to\_side visiting with friends and family when opportunity  
presents itself .  
PAR: and I enjoy &s &uh spending time with children .  
PAR: my sister has a little boy .  
PAR: he'll be two in August though .  
STU: oh ‡ wow .  
PAR: he's pretty entertaining when he comes .  
STU: +< &=laughs .  
STU: now ‡ is that her only child ?  
PAR: yes &=head:yes .  
PAR: nice .  
STU: so ‡ do they [/] they live around here as\_well ?  
PAR: +< yes ‡ she's [/] she lives about fifteen minutes from me .  
STU: oh ‡ that's really convenient .  
STU: so ‡ you get to see her probably quite a bit ,, right ?  
PAR: not as much as I'd like to .  
PAR: <she works> [/] (.) she works the way I useta (.) and the way she useta chew me out

about doing .  
INV1: +< &=laughs .  
PAR: but [/] well ‡ she's better &=ges .  
PAR: she useta hafta travel a \_lot .  
PAR: but she doesn't as much now .  
PAR: since the baby's here .  
STU: nice .  
STU: has she been to any fun places ?  
STU: or was it mostly like in the United \_States ?  
PAR: Belgium .  
PAR: &um and then &um where was it ?  
PAR: gosh I can't remember the country where they had the Olympics overseas .  
STU: Rio , where it's gonna be now ?  
PAR: +< hmhm no ‡ it was &=ges:before .  
STU: +< or Beijing ?  
PAR: no ‡ &um goodness I can't remember the name .  
PAR: but she's had an opportunity &=ges to get outside the country &uh a few times .  
STU: +< nice .  
PAR: and I said +"/.  
PAR: +" well ‡ I guess that's [/] that's the balance .  
PAR: +" that's how they keep you &=ges:winding reeled in .  
STU: &=laughs .  
PAR: give you an exciting place to go to to make up for &=ges:back\_and\_forth all that zigzagging across the US .  
STU: right .  
PAR: but <what does she> [/] what does she do ?  
PAR: she's in clinical research .  
STU: nice .  
STU: does she work for a pharmaceutical company or does she just work for a research ?  
PAR: no ‡ her firm just does the research &=ges .  
STU: okay .  
PAR: not affiliated with any particular pharmaceutical company .  
STU: okay .  
STU: nice .  
STU: now ‡ what did you do ?  
STU: &um you said that you &w useta work a \_lot\_of hours and stuff .  
STU: what were you ?  
PAR: +< &um (.) I was a clinical manager for a mental health and substance abuse assessment team .  
PAR: we would &um meet and assess individuals .  
PAR: and then get them matched up &=ges with treatment services .  
STU: did you like doing that ?  
PAR: I did .  
PAR: <it was> [/] it was very draining and demanding , though .  
PAR: hard to &=ges:cut cut it off sometimes .  
STU: right .

STU: that kind\_of ties back into &um some of the work that you're doing with your church with the homeless though .

PAR: mhm &=head:yes .

STU: like givin(g) back and helpin(g) others .

PAR: mhm &=head:yes .

STU: must be a really good person .

PAR: well ‡ I'm gonna help when I can .

PAR: (be)cause you never know when that &=ges:turning tide may turn .

STU: +< yeah definitely .

PAR: +< you're on the other side and needing some assistance .

STU: exactly .

STU: &um <so where did> [/] so ‡ &y do you have a degree or where did you go to school?

PAR: +< I &wa attended North\_Carolina\_Central\_University undergrad and grad .

STU: oh ‡ nice .

PAR: +< &um criminal justice .

PAR: and criminology with &=ges correctional counseling for grad .

STU: so that's where I actually go to school too is N\_C\_Central for &um speech language pathology .

PAR: wow (.) that's why I'm out helping you all .

STU: well ‡ thank\_you we really appreciate that .

PAR: +< no problem .

STU: &um did you ever wanna go back to school again or are [/] you're happy with your +..?

PAR: oo !

STU: &=laughs .

PAR: I think I've had my fill of school for a long time .

PAR: because after I &=throat:clears finished all that &=throat:clears .

PAR: then I got my substance abuse &=ges license .

PAR: I'm licensed clinical addiction specialist .

PAR: so &=ges that was additional school .

STU: right .

STU: what [/] what else goes into all that ?

STU: is it like a year or is it (..) just classes that you take ?

PAR: +< well ‡ it's classes combined with work experience .

PAR: so ‡ &=ges:step\_by\_step I\_mean I did some work in the court system (..) &um worked as a mitigation specialist for a number of years .

PAR: &um so your work experience &=ges:balance <and the> [/] and the class &um hours kind\_of combine &=ges:together .

PAR: and then you [/] &um you test &=ges &=ges:continuing (.) &uh both written and orally to secure the license or certification depending on what level &=ges:levels you're going for .

STU: nice .

STU: so ‡ there's different levels that you can get ?

PAR: mhm .

STU: +< is it kind\_of like beginner , intermediate , that kind of thing ?

PAR: +< well ‡ I\_mean if you're interested in working in prevention .  
PAR: it's kind\_of on I &won don't wanna say on the lower scale .  
PAR: (be)cause it's just as valuable .  
PAR: &um but it [/] &ju &=ges it doesn't take as much (.) to get that .  
STU: +< okay .  
PAR: (be)cause a\_lot\_of that focuses more on you &=ges than +...  
PAR: you\_know you &s you\_know things in school , programs and diversion programs ,  
things like that .  
PAR: then you move up to &uh certified substance abuse counselor .  
PAR: and masters level &=ges:level , you can go for the actual licensure .  
STU: now ‡ does your church ever do like mission trips or anything like that to other  
countries ?  
PAR: +< yes &=head:yes .  
PAR: yes ‡ they've &um (.) established a connection with a program and services in Haiti .  
PAR: so they &=ges:back\_and\_forth made a couple trips there .  
PAR: and (.) as a matter of fact this year &=ges they're now &=ges:joining in discussions  
trying to figure out &=ges:next where else would you like to go ?  
STU: nice .  
STU: when they go , how long do they usually stay ?  
PAR: well ‡ that varies depending on what they're doing .  
PAR: because &um (.) they [/] &als &=ges they've gone to Africa .  
PAR: and they help with the [/] &um starting up a school .  
PAR: so ‡ that [/] that took a little bit longer .  
PAR: for which they did some &=ges &uh &s education and school support in Haiti too .  
PAR: but &=ges what they did in Africa was a little more extensive &=ges:longer than what  
they did in Haiti &=ges .  
PAR: so ‡ depending on (.) the project and [/] and all .  
STU: yeah ‡ do you have a big church ?  
STU: it sounds like they're very involved like there would be a\_lot\_of people .  
PAR: it's a fairly [/] few [/] few thousand .  
PAR: well ‡ wait a minute , I'm trying to remember .  
PAR: I think it's <the last> [/] if I can recall when he talked about as far as people officially  
on the books I think it was just shy of three .  
STU: three thousand ?  
PAR: +< thousand , yeah .  
STU: +< wow .  
PAR: but I [x 3] think that must be the [/] the books from &=ges:wide\_spread the beginning  
of time on up .  
STU: +< &=laughs .  
STU: that's a\_lot\_of people .  
STU: definitely .  
STU: do you have any fun plans for this summer ?  
PAR: oh ‡ no nothing specific .  
PAR: &um (.) we do have a family reunion coming up in August .  
PAR: but I don't think I'm gonna be able to make it .  
PAR: I'm not gonna be able to afford it .

PAR: when [/] when the income is cut back some [/] some of that exciting planning &=ges  
is cut back too .

STU: yes .

PAR: I'm just hanging out with friends (..) my godchildren and nephew and +...

STU: where is the family reunion at ?

PAR: this year's gonna be in Washington state .

STU: wow .

PAR: yeah ‡ the last one was in &uh Texas .

PAR: and before that it was &um Louisiana .

PAR: I made the Louisiana one .

PAR: I didn't make &=taps:table (.) the one in Texas .

STU: nice .

STU: &um I think our time is up .

STU: well ‡ I enjoyed learning about you and your church and your family .

STU: thank\_you .

PAR: +< thank\_you ‡ it was nice talking with you .

INV1: thank\_you .

PAR: &=laughs okay (.) alrighty .

**Minga 37 (White, 54 years old; RHD; 8 questions asked)**

@G: First Encounter

INV: &-um I would like for you to meet somebody now.

INV: and &-uh you've never met her before.

INV: well you met her for two minutes but+....

INV: you've never met her before.

INV: shes a student here.

INV: and I would like for you to get to know her.

INV: It's not an interview &-um so she doesn't have any  
planned questions or anything.

INV: this is just a chance for the two of you to get to know each other.

INV: so I'm going to step out and see if I can get her

INV: hi!

PAR: hi!

STU: how are you doing.

PAR: good thank you.

PAR: how are you today

STU: good

PAR: were you involved here in the explosion yesterday?

STU: I wasn't but my friends are at the Healthy Start +//.

PAR: +> so yeah my daughter rode+//.

STU: +, and &-uh the windows were blown out.

PAR: and they're okay?

STU: they're okay &-uh but they they +//.

PAR: +>are really shaken.

STU: they were really shook up and they had to leave early.

STU: and they dismissed the kids early.

STU: so yeah!  
PAR: I'm glad you're okay though.  
STU: do you live near where it was?  
PAR: a couple of blocks away but &-um <I was> [/] I was walking with friends  
South of &-uh Southpoint so she said she heard it  
PAR: I didn't hear it .  
STU: did you watch the news?  
PAR: I did.  
PAR: I watch entirely too much news about it.  
PAR: contacted some friends and made sure everyone was okay.  
PAR: yeah it looked pretty bad.  
PAR: it was really bad seeing the helicopter coverage.  
PAR: are we just having a conversation?  
STU: yeah!  
STU: so I think it's just kind\_of supposed to be like kind\_of ask each other xxx.  
PAR: uhu!  
PAR: uhu!  
PAR: so you're a graduate student?  
STU: yes Mam.  
STU: in my first year  
PAR: Speech Pathology?  
STU: yeah so I'm doing this research as a job and a research  
Assistant kind\_of thing yeah.  
PAR: what was your undergraduate degree in?  
STU: my xxx undergrad was in Speech too xxx.  
STU: from Appalachian State  
PAR: oh okay!  
PAR: Great!  
PAR: so cooler summers.  
STU: it's very cool there.  
STU: it's cold there all the time.  
PAR: so you're happy to be in Durham in the heat?  
STU: that was why I kind\_of chose to come here partially.  
STU: I spent four years there.  
STU: and it's winter like all the time.  
STU: need more seasons.  
STU: need less winter more summer.  
PAR: where did you grow up?  
STU: I grew up not far from here in Burlington North Carolina  
PAR: +< oh okay so yeah you're much closer.  
STU: yeah it's also good to be closer to home and be close to my family.  
PAR: what made you interested in speech pathology?  
PAR: that seems like such a specific thing to know that you want to focus in at the time  
you're in undergrad.  
STU: +< right!  
STU: so &-um I didn't start off with my undergrad in Speech.

STU: I started off doing &-uh Nursing.  
STU: and then I was like &-uh +...  
STU: and then <I started I> [/] I switched to Elementary Education.  
STU: and then I really wasn't into that.  
STU: &-uh my Mom is an S\_L\_P.  
STU: and I was always like +...  
STU: an S\_L\_P I don't like what she does.  
STU: I wasn't interested in it.  
STU: but the more time I spent looking into it it had a \_lot  
of things that I liked .  
STU: and I really liked the medical aspect of it.  
STU: but I also like that there's a \_lot of language stuff involved.  
STU: so I switched into that.  
PAR: well great!  
STU: it's weird having a Mom who's an S\_L\_P you like xxx.  
STU: but you also have more information than you probably should sometimes so +....  
PAR: especially so early in your career.  
STU: +< right!  
STU: I was like I don't want to do Speech because my Mom is  
always complaining about how much paperwork she has to do.  
PAR: well I think that's everything in medicine these days  
STU: right!.  
STU: there's way too much paperwork across the board.  
STU: what did you do?  
PAR: &-um well Im retired now since my stroke.  
PAR: &-um I was a Physician.  
PAR: and &-um actually think &-uh part of &-uh the reason that I had the stroke was  
because of the demands of the electronic medical record and the additional  
stresses from that.  
STU: were you with Peds or with a specific population?  
PAR: I was an O\_B\_G\_Y\_N.  
STU: oh that's really cool.  
STU: that's really rewarding.  
PAR: +<yeah I really enjoyed it.  
PAR: happy medicine for the most part.  
PAR: and I really enjoyed delivering babies.  
STU: yeah!  
STU: <I have> [/] I have a \_lot of friends <in my> [/] that I grew up with who are  
looking at that now.  
PAR: +<yeah!  
STU: they love it!  
PAR: it is very demanding the time constraints.  
PAR: <I didn't> [/] the time spent with patients I found very rewarding.  
PAR: the time spent with the computer not so much  
STU: yeah I spend all day on my computer.  
STU: need a break every now and then to redirect



PAR: it just took so much longer .

PAR: probably only a third of time was actually spent with patients and the other two thirds

documenting endless xxx yeah.

STU: +< wow!

PAR: hopefully it's gotten better as people worked it out.

PAR: have progressed as people have gotten more used to working with them.

STU: xxx but &-uh that part I don't miss at all.

STU: there's always part of your job that you don't like

PAR: yeah that's true.

PAR: that's why they call it a job right?

STU: +< right!

STU: exactly!
